# Supplementary material for: A Preclinical Mouse Model of Invasive Lobular Breast Cancer Metastasis
Source: Oxford University Press journal article supplement (doi:10.1158/0008-5472.can-11-4208), 2012-11-14
Supplement: 00085472can114208-sup-figleg.pdf [file 00085472can114208-sup-figleg.pdf]

## Supplementary Legends

**Figure S1. Recipient mice develop pleiomorphic mILCs that are infiltrated by immune cells.** (A)

Recipient mammary tumors were characterized by immunohistochemistry and classified based on their histological phenotype (n=16, 14 and 14 for recipients 1, 2 and 3 respectively). (B) Like spontaneous *K14cre;Cdh1<sup>F/F</sup>;Trp53<sup>F/F</sup>* derived mammary tumors (upper row), recipient mammary tumors (lower row) are infiltrated by CD3<sup>+</sup> T-lymphocytes and F4/80<sup>+</sup> macrophages. Scale bar = 50  $\mu$ m. Representative images are shown.

**Figure S2. Genomic profiles of *K14cre;Cdh1<sup>F/F</sup>;Trp53<sup>F/F</sup>* derived donor mILCs are highly conserved in transplanted recipient outgrowths.** (A-C)

Genomic profiles of paired *K14cre;Cdh1<sup>F/F</sup>;Trp53<sup>F/F</sup>* derived donor tumors (red curves, A = donor mILC 1, B= donor mILC 2, C=donor mILC 3) and related recipient outgrowths (grey and black curves, n=3-4 per donor).

**Figure S3. Recipient mammary tumors and distant metastases exhibit very similar genomic profiles.** (A-C)

aCGH profiles of paired recipient mammary tumors (red curves, A=recipient 1b, B=recipient 2b, C=recipient 3b) and related lung- and lymph node metastases (grey and black curves, n=2-3 per recipient).

**Figure S4. Genomic profiles of paired lung- and lymph node metastases suggest that metastatic dissemination to these organs is not driven by recurrent, tissue specific copy number aberrations.**

Paired sets (3-4 sets per donor) of recipient mammary tumors and related lymph node- (A&C) or lung metastases (B&D) were analyzed by aCGH. Using quantile normalized genomic profiles, we directly compared paired genomic profiles by computing so-called 'delta-profiles' and subtracting the genomic profiles of recipient mammary tumors from their related metastases. Delta-profiles were then segmented and segments which exceeded an absolute value of 0.1 (A&B) or 0.2 (C&D) were plotted per chromosome. (DR set, paired sets (indicated by lower case letters) of donor-related (indicated by numbers) recipient mammary tumors and their metastases. R, recipient tissue; ax. LN, axillary lymph node metastasis; caud. LN, caudal lymph node metastasis; lung, lung metastasis; renal LN, renal lymph node metastasis; tumor, primary mammary tumor).
